# Supplementary material
Source: publisher figshare collection journal article supplement (https://gsajournals.figshare.com/ndownloader/files/23594090)
Supplement: Supplementary file 1 [file 23594090]

**Table S1. P-values for survival distributions determined by the log-rank test for Figure 4**

| **Female** |  | **Control**  **Injured** | ***MtkR1***  **Uninjured** | ***MtkR1***  **Injured** |
| --- | --- | --- | --- | --- |
| **Control**  **Uninjured** | <0.0001 | <0.0001 | <0.0001 |
| **Control**  **Injured** |  | <0.0001 | <0.0001 |
| ***MtkR1***  **Uninjured** |  |  | 0.001 |
| **Male** |  | **Control**  **Injured** | ***MtkR1***  **Uninjured** | ***MtkR1***  **Injured** |
| **Control**  **Uninjured** | <0.0001 | <0.0001 | 0.01 |
| **Control**  **Injured** |  | <0.0001 | <0.0001 |
| ***MtkR1***  **Uninjured** |  |  | <0.0001 |
